# Supplementary material for: MALDI-TOF MS Approaches for the Identification of the Susceptibility of Extended-Spectrum β-Lactamases in Escherichia coli
Source: MDPI journal article supplement (doi:10.3390/microorganisms11051250), 2023-05-09
Supplement: s1 [file s1]

|   | ( µg/mL )       |     |     |       |        |        |            |            |    |              |       |         |
|---|-----------------|-----|-----|-------|--------|--------|------------|------------|----|--------------|-------|---------|
|   | 1               | 2   | 3   | 4     | 5      | 6      | 7          | 8          | 9  | 10           | 11    | 12      |
| A | ABPC<br>32      | 16  | 8   | 2     | 1      | 0.5    | FMOX<br>32 | 16         | 8  | S/C<br>32/32 | 16/16 | 8/8     |
| B | PIPC<br>64      | 32  | 16  | 8     | 4      | 2      | AZT<br>16  | 8          | 4  | MINO<br>8    | 4     | 2       |
| C | CTX<br>32       | 16  | 8   | 4     | 2      | 1      | FOM<br>128 | 64         | 32 | MEPM<br>16   | 8     | 4       |
| D | CTX/CVA<br>4/4  | 2/4 | 1/4 | 0.5/4 | 0.25/4 | 0.12/4 | AMK<br>32  | 16         | 8  | GM<br>8      | 4     | 2       |
| E | CAZ<br>32       | 16  | 8   | 4     | 2      | 1      | LVFX<br>8  | 4          | 2  | CPFX<br>4    | 2     | 1       |
| F | CAZ/CVA<br>4/4  | 2/4 | 1/4 | 0.5/4 | 0.25/4 | 0.12/4 | CAZ<br>64  | CAZ*<br>16 | 8  | 4            | 2     | 1       |
| G | CPDX<br>32      | 16  | 8   | 4     | 2      | 1      | IPM<br>32  | IPM*<br>8  | 4  | 2            | 1     | 0.5     |
| H | CPDX/CVA<br>4/4 | 2/4 | 1/4 | 0.5/4 | 0.25/4 | 0.12/4 | IPM<br>16  | 8          | 4  | 2            | 1     | Control |

CAZ\*(F8-12) and IPM\* (G8-12): including dipicolinic acid (DPA).

**Figure S1.** The layout of antibiotics and their concentrations on the DPD-1 plate.
